# Supplementary material
Source: Springer Nature journal article supplement (https://www.springermedizin.de/resource/supplementary/12936_2009_931_MOESM6_ESM.pdf/9548562)

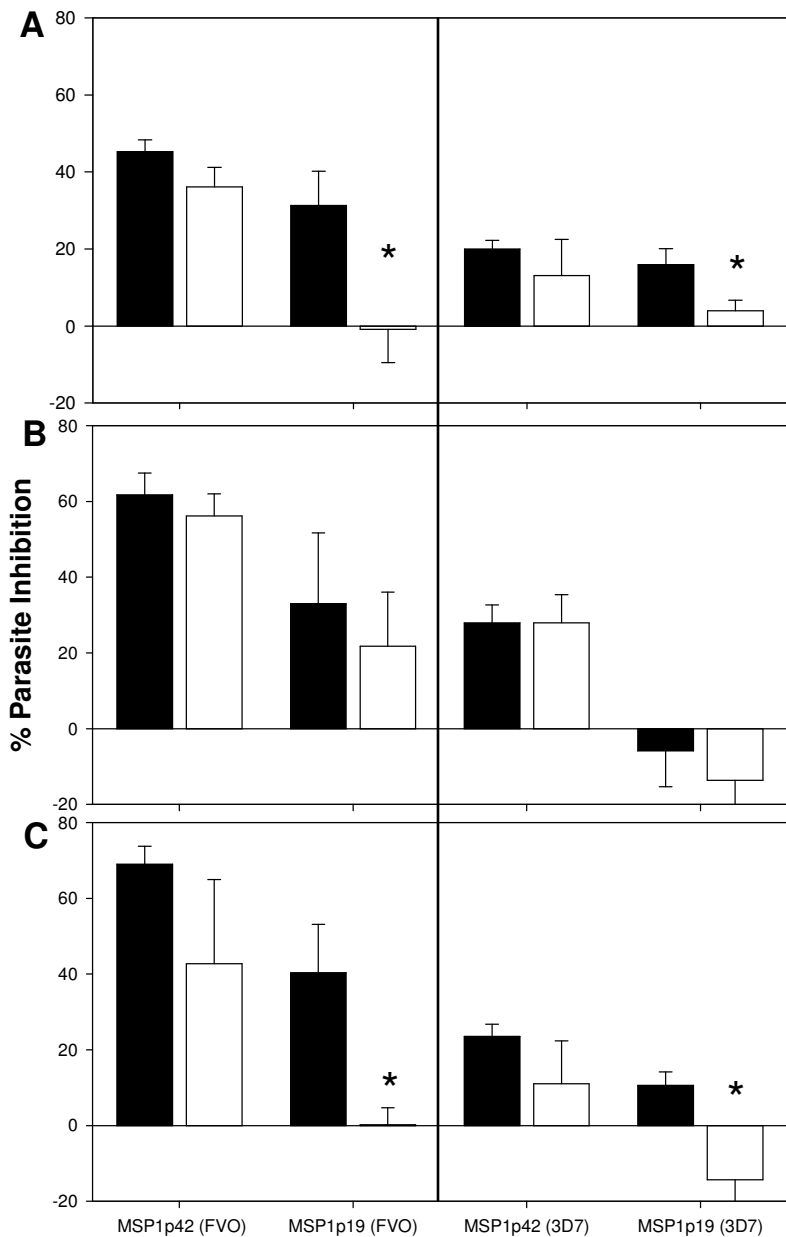

**Specificity of Polyclonal Antibodies**

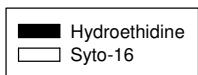

Supplement: MOESM6 [file 9548562]
